# Supplementary material for: Relationship of Bacterial Richness to Organic Degradation Rate and Sediment Age in Subseafloor Sediment
Source: PubMed Central journal article supplement (PMC4968545; doi:10.1128/aem.00809-16), 2016-07-29
Supplement: AEM.00809-16_zam999117347so1.pdf [file AEM.00809-16_zam999117347so1.pdf]

**Supplementary Information for**  
**Relationship of bacterial richness to organic degradation rate and**  
**sediment age in seafloor sediment**

**Emily A. Walsh<sup>1</sup>, John B. Kirkpatrick<sup>1</sup>, Robert Pockalny<sup>1</sup>, Justine Sauvage<sup>1</sup>, Arthur J. Spivack<sup>1</sup>, Richard W. Murray<sup>2</sup>, Mitchell L. Sogin<sup>3</sup> and Steven D'Hondt<sup>1</sup>**

<sup>1</sup>Graduate School of Oceanography, University of Rhode Island, Narragansett Bay Campus, 215 South Ferry Road, Narragansett, RI 02882, USA

<sup>2</sup>Department of Earth and Environment, Boston University, Boston, MA 02066, USA

<sup>3</sup>Josephine Bay Paul Center for Comparative Molecular Biology and Evolution, Marine Biological Laboratory, 7 MBL Street, Woods Hole, MA 02543, USA

## **Site details**

We present properties of each site in Table 1.

## **Richness of Operational Taxonomic Units at multiple cut-off levels**

Bacterial taxonomic richness, as measured by numbers of operational taxonomic units (OTUs) in samples normalized to equal numbers of reads, is highest near the seafloor and drops exponentially with increasing sediment depth at all four sites. This exponential decline in richness occurs at every phylogenetic level; whether defined by similarity as high as 100% or as low as 85%, the number of operational taxonomic units in normalized samples declines with increasing sediment depth (Fig. S1).

## **Comparison of Chao1 richness estimates to Catchall parametric estimates**

Because the Chao1 index may underestimate richness relative to parametric approaches, we compare our Chao1 estimates to estimates from parametric modeling of the diversity data using CatchAll<sup>1</sup>. The best Catchall parametric models for these data sets were evenly divided between two mixed exponential and three mixed exponential models; shown here are two mixed exponential results. In all cases, two mixed versus three mixed exponential model results were within one standard error of each other. Although our Catchall results vary somewhat from our Chao1 results in their absolute values of estimated richness, the vertical trends in richness are nearly identical for the two approaches (Figs. S2, S3). This analysis shows that the exponential declines in richness with sediment depth and age are real and not an artifact of the method used to calculate richness.

### **Taxonomic composition**

We show the assigned taxonomy of dominant OTUs in figure S4. Many OTUs do not have well-defined taxonomy, either belonging to unknown members of candidate phyla or falling between known phyla of bacteria (Domain Bacteria; phyla NA). Dominant identifiable taxa include members of Chloroflexi (most notably Dehalococcoidetes), candidate division OP9, Planctomycetes, Deltaproteobacteria, Nitrospirae, and others.

### **Correction of dissolved inorganic carbon (DIC) values from EQP1 and EQP8**

Because carbonate sediment is present in the sediment of EQP1 and EQP8, carbonate precipitation occurs in the sediment during the depressurization and warming associated with core recovery from the seafloor and subsequent sample processing. Such precipitation decreases DIC and alkalinity concentrations in the minutes and hours prior to porewater extraction. We used the method of Sauvage et al.<sup>2</sup> to account for changes in DIC and alkalinity that resulted from precipitation during recovery and processing of EQP1 and EQP8 core samples (Fig. S5).

### **Calculation of ammonium production and organic oxidation at U1343**

For comparison of respiration calculated from the  $\text{NH}_4^+$  profile to respiration calculated from the DIC profile at U1343 (Fig. S6), we converted  $\text{NH}_4^+$  production to organic carbon oxidation by assuming that (i) all degraded organic matter had a Redfield C:N stoichiometry of 120:16 (following Anderson and Sarmiento<sup>3</sup>), (ii) all organic carbon degraded at depths shallower than 8 mbsf (the approximate depth of the sulfate-reducing methane oxidation front) was completely oxidized to  $\text{CO}_2$ , and (iii) only half of all organic carbon degraded at greater depths (where external electron acceptors are largely absent) is oxidized to  $\text{CO}_2$  and the remaining organic matter degraded is in reduced form

(e.g., CH<sub>4</sub>).

### **Supplemental References**

1. **Bunge J, Woodard L, Böhning D, Foster J, Connolly S, Allen H.** 2012. Estimating population diversity with CatchAll. *Bioinformatics* **28**:1045–1047.
2. **Sauvage J, Spivack AJ, Murray RW, D'Hondt S,** 2014. Determination of in situ dissolved inorganic carbon concentration and alkalinity for marine sedimentary porewater. *Chem. Geol.* **387**:66–73.
3. **Anderson LA, Sarmiento JL,** 1995. Global ocean phosphate and oxygen simulations. *Glob. Biogeochem. Cy.* **9**:621-636.

## Supplementary Table

| VAMPS ID                      | Sample ID  | Latitude       | Longitude       | Water Depth (m) | Sample Depth (mbsf) | Age (yrs) | TOC (wt%) | Sulfate (mM) | TON (wt%) | C:N Ratio | Cells (log10/g) |
|-------------------------------|------------|----------------|-----------------|-----------------|---------------------|-----------|-----------|--------------|-----------|-----------|-----------------|
| DCOWALBv6v4.Bering1Bv6v4      | BS1        | 57°33.3993'N   | 175°48.9659'W   | 1953            | 0.16                | 615       | 1.14      | 25.85        | 0.129     | 8.83      | 7.6             |
| DCOWALBv6v4.Bering2Bv6v4      | BS2        | 57°33.3993'N   | 175°48.9659'W   | 1953            | 1.66                | 6384      | 0.84      | 20.85        | 0.104     | 8.13      | 6.2             |
| DCOWALBv6v4.Bering3Bv6v4      | BS3        | 57°33.3993'N   | 175°48.9659'W   | 1953            | 5.66                | 21768     | 0.93      | 11.88        | 0.105     | 8.91      | 6.2             |
| DCOWALBv6v4.Bering4Bv6v4      | BS4        | 57°33.3993'N   | 175°48.9659'W   | 1953            | 8.66                | 33306     | 0.80      | 0.00         | 0.223     | 3.56      | 5.7             |
| DCOWALBv6v4.Bering5Bv6v4      | BS5        | 57°33.3993'N   | 175°48.9659'W   | 1953            | 11.27               | 43344     | 0.66      | 0.00         | 0.089     | 7.41      | 5.4             |
| DCOWALBv6v4.BS55B             | BS5.5      | 57°33.3993'N   | 175°48.9659'W   | 1953            | 24.13               | 92804     | 0.70      | 0.00         | 0.110     | 6.31      | 5.3             |
| DCOWALBv6v4.Bering6Bv6v4      | BS6        | 57°33.3993'N   | 175°48.9659'W   | 1953            | 86.5                | 332679    | 0.59      | 0.00         | 0.097     | 6.06      | 4               |
| DCOWALBv6v4.Bering7Bv6v4      | BS7        | 57°33.3993'N   | 175°48.9659'W   | 1953            | 224                 | 861504    | 0.61      | 0.00         | 0.099     | 6.17      | 2.5             |
| DCOWALBv6v4.Bering8Bv6v4      | BS8        | 57°33.3993'N   | 175°48.9659'W   | 1953            | 440                 | 1692240   | 0.60      | 0.00         | 0.102     | 5.90      | 3.7             |
| KCKEQPBv6v4.EQP1MC5cm         | EQP 1 SEDA | 01°48.2091'N   | 086°11.3787'W   | 2885            | 0.05                | 1351      | 0.59      | 27.64        | 0.092     | 6.46      | 9.4             |
| KCKEQPBv6v4.EQP1MC25cm        | EQP 1 SEDB | 01°48.2091'N   | 086°11.3787'W   | 2885            | 0.25                | 6757      | 0.76      | 27.71        | 0.095     | 7.98      | 6.3             |
| KCKEQPBv6v4.EQP1SEC4          | EQP 1 SEDC | 01°48.2091'N   | 086°11.3787'W   | 2885            | 7.21                | 194864    | 0.72      | 27.28        | n/a       | n/a       | 6.7             |
| KCKEQPBv6v4.EQP1SEC6          | EQP 1 SEDD | 01°48.2091'N   | 086°11.3787'W   | 2885            | 10.18               | 275135    | 0.53      | 27.60        | 0.061     | 8.65      | 9.3             |
| KCKEQPBv6v4.EQP134M           | EQP 1 SEDE | 01°48.2091'N   | 086°11.3787'W   | 2885            | 34                  | 923513    | 0.44      | 24.87        | 0.068     | 6.49      | 7               |
| KCKEQPBv6v4.EQP8SEDA          | EQP 8 SEDA | 00°00.5291'N   | 147°47.4947'W   | 4336            | 0.05                | 10081     | 0.33      | 27.82        | 0.038     | 8.69      | 8.9             |
| KCKEQPBv6v4.EQP8SEDB          | EQP 8 SEDB | 00°00.5291'N   | 147°47.4947'W   | 4336            | 2.2                 | 443548    | 0.28      | 27.89        | 0.020     | 14.12     | 8.0             |
| KCKEQPBv6v4.EQP8SEDC          | EQP 8 SEDC | 00°00.5291'N   | 147°47.4947'W   | 4336            | 26                  | 5241935   | 0.23      | 27.74        | 0.000     | n/a       | 5.4             |
| JBKIOBv6v4.NHGP14A4msediment  | IN1        | 16° 03.5577' N | 082° 05.6218' E | 895             | 4                   | 40000     | 1.42      | 17.14        | 0.095     | 14.85     | n/a             |
| JBKIOBv6v4.NHGP14A12msediment | IN2        | 16° 03.5577' N | 082° 05.6218' E | 895             | 12                  | 89999     | 1.26      | 13.79        | 0.095     | 13.21     | n/a             |
| JBKIOBv6v4.NHGP14A21msediment | IN3        | 16° 03.5577' N | 082° 05.6218' E | 895             | 21                  | 212220    | 1.47      | 4.59         | 0.095     | 15.41     | n/a             |
| JBKIOBv6v4.NHGP14A31msediment | IN4        | 16° 03.5577' N | 082° 05.6218' E | 895             | 31                  | 317775    | 1.70      | 0.04         | 0.097     | 17.44     | n/a             |
| JBKIOBv6v4.NHGP14A40msediment | IN5        | 16° 03.5577' N | 082° 05.6218' E | 895             | 40                  | 423329    | 1.46      | 0.04         | 0.102     | 14.29     | n/a             |
| JBKIOBv6v4.NHGP14A49msediment | IN6        | 16° 03.5577' N | 082° 05.6218' E | 895             | 49                  | 528884    | 1.72      | 0.00         | 0.109     | 15.74     | n/a             |
| JBKIOBv6v4.NHGP14A59msediment | IN7        | 16° 03.5577' N | 082° 05.6218' E | 895             | 59                  | 633105    | 0.97      | 0.00         | 0.076     | 12.71     | n/a             |

**Table S1.** Environmental and sampling data for Sites U1343, EQP1, EQP8, and NGHP-

14.

## Supplementary Figures

Figure S1.

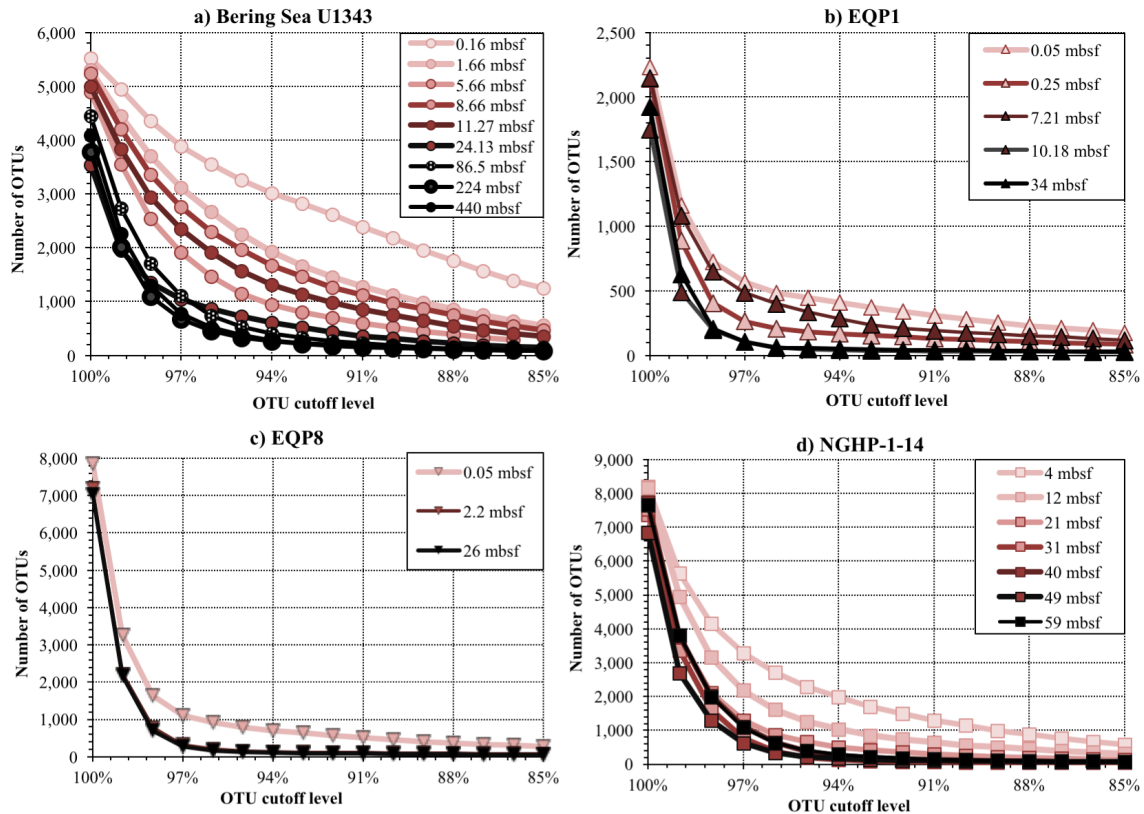

**Figure S1.** Plots of bacterial richness at multiple levels of genetic similarity, at each depth below seafloor: (A) U1343, (B) EQP1, (C) EQP8, and (D) NGHP-14. The x-axis indicates the cutoff level for clustering (percent sequence identity) and the y-axis indicates the number of OTUs generated. Sequence data at each site was subsampled to normalize each sample to the smallest number of reads for that site: (5,699 for U1343, 2,444 for EQP1, 9,174 for EQP8, and 9,159 for NGHP-14).

**Figure S2.**

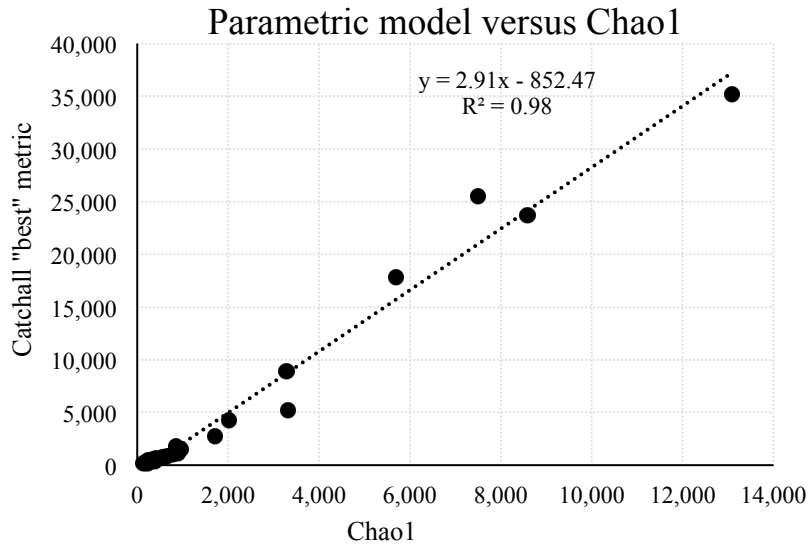

**Figure S2.** Comparison of (i) richness values calculated using the best parametric model as calculated by CatchAll (Bunge *et al.*<sup>1</sup>) to (ii) values calculated using the Chao1 metric.

**Figure S3.**

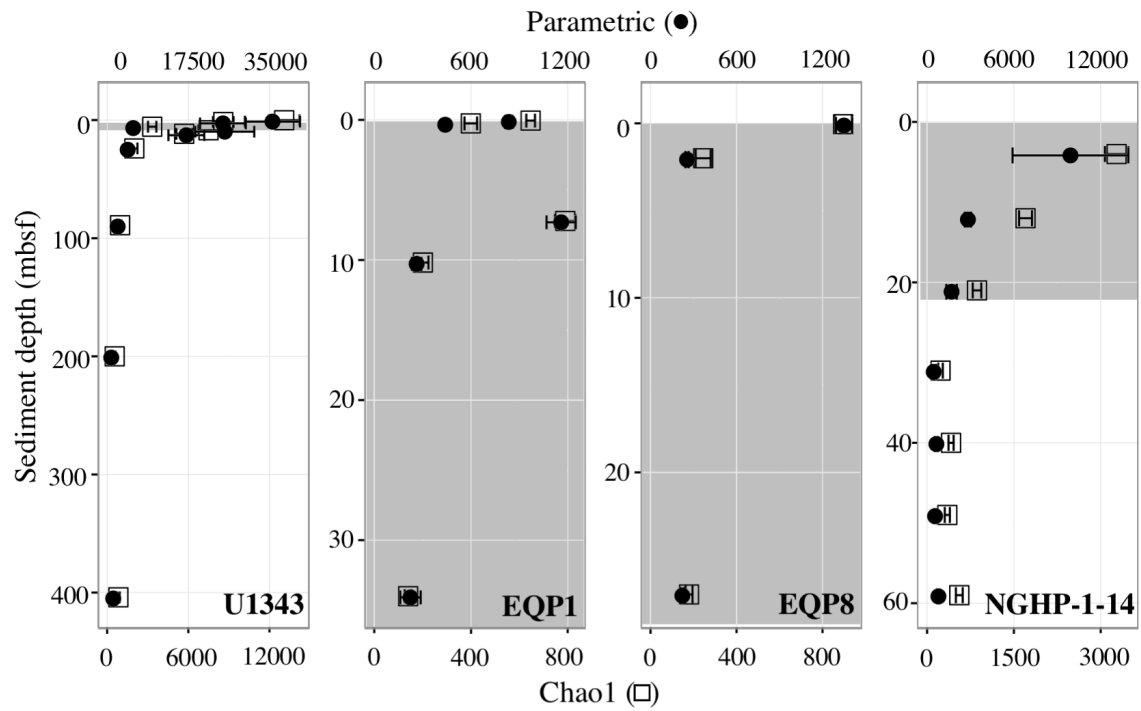

**Figure S3.** Vertical distributions of richness values calculated using (i) the bestparametric model as calculated with CatchAll (Bunge *et al.*<sup>1</sup>), (black circles) and (ii) the Chao1 diversity metric (white squares). Error bars indicate standard error. For black circles where no error bar is visible, standard error is smaller than the circle.



**Figure S4.**

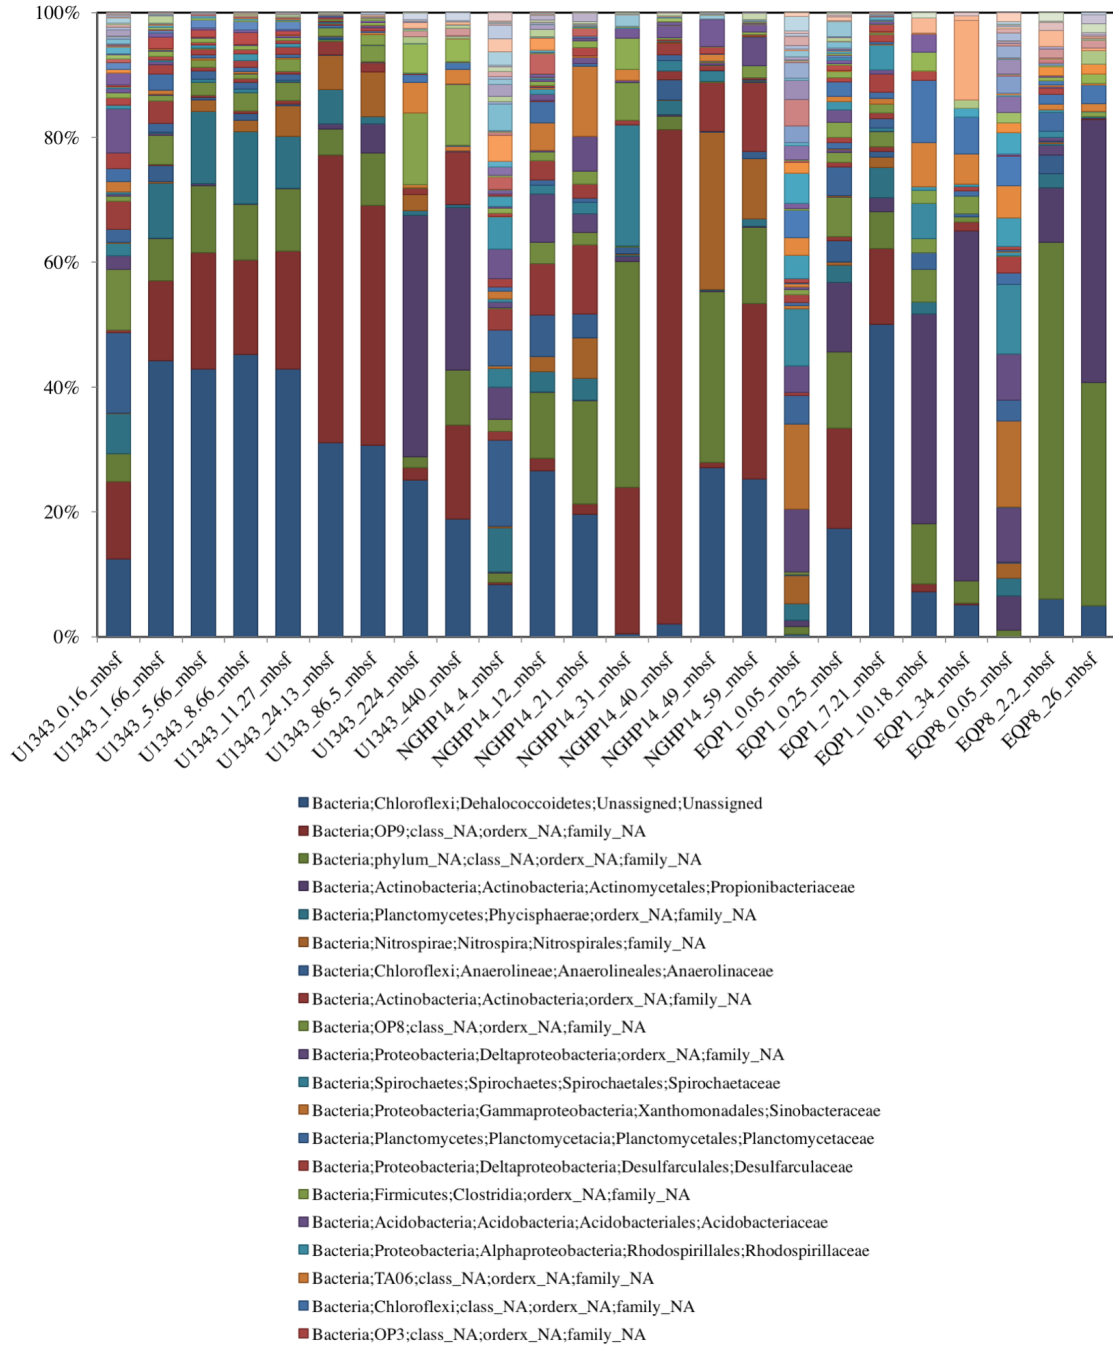

**Figure S4.** Taxonomic (phylum-level) breakdown of dominant taxa at U1343, NGHP-14, EQP1, and EQP8. For each site, samples are shown in depth order (mbsf = meters below seafloor).

**Figure S5.**

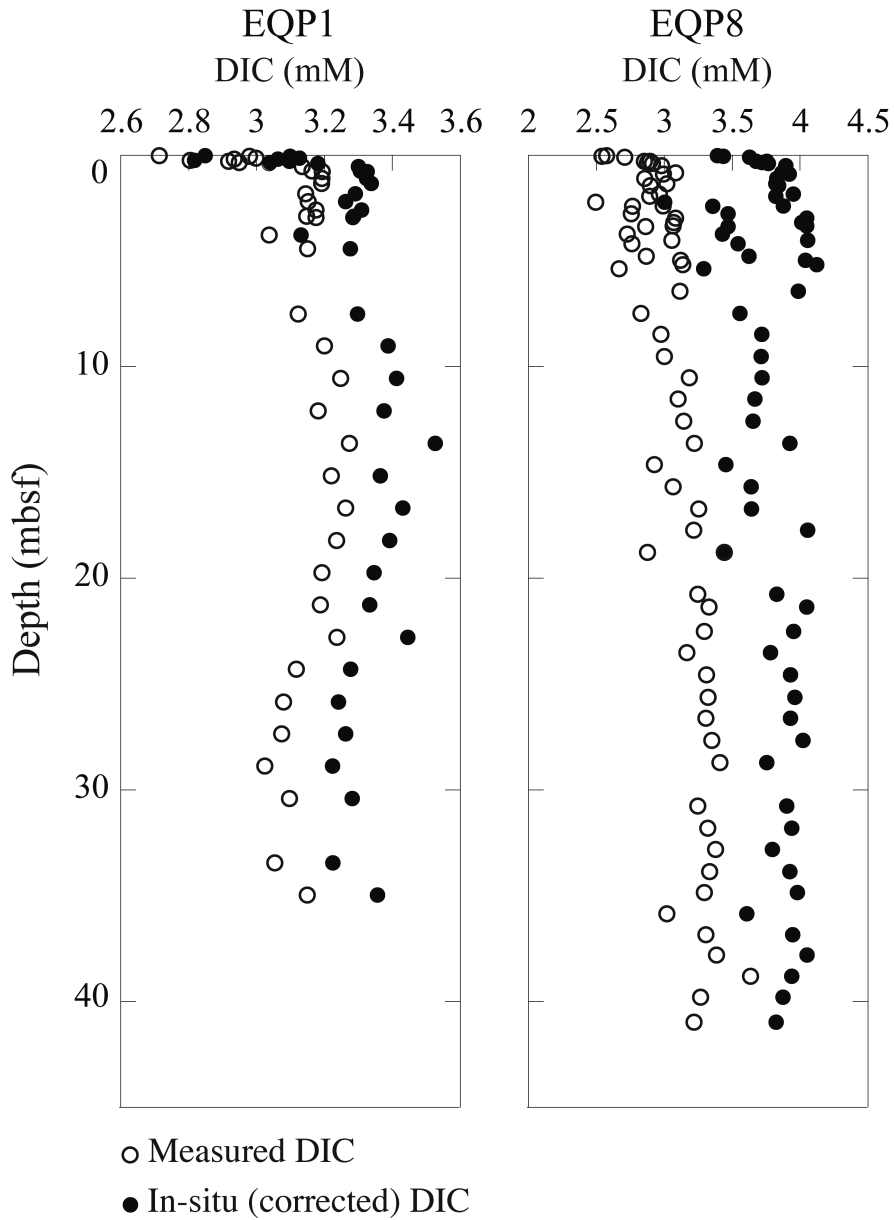

**Figure S5.** Vertical profiles of measured DIC values (red circles) and corrected DIC values (blue squares) at EQP1, and EQP8.

**Figure S6.**

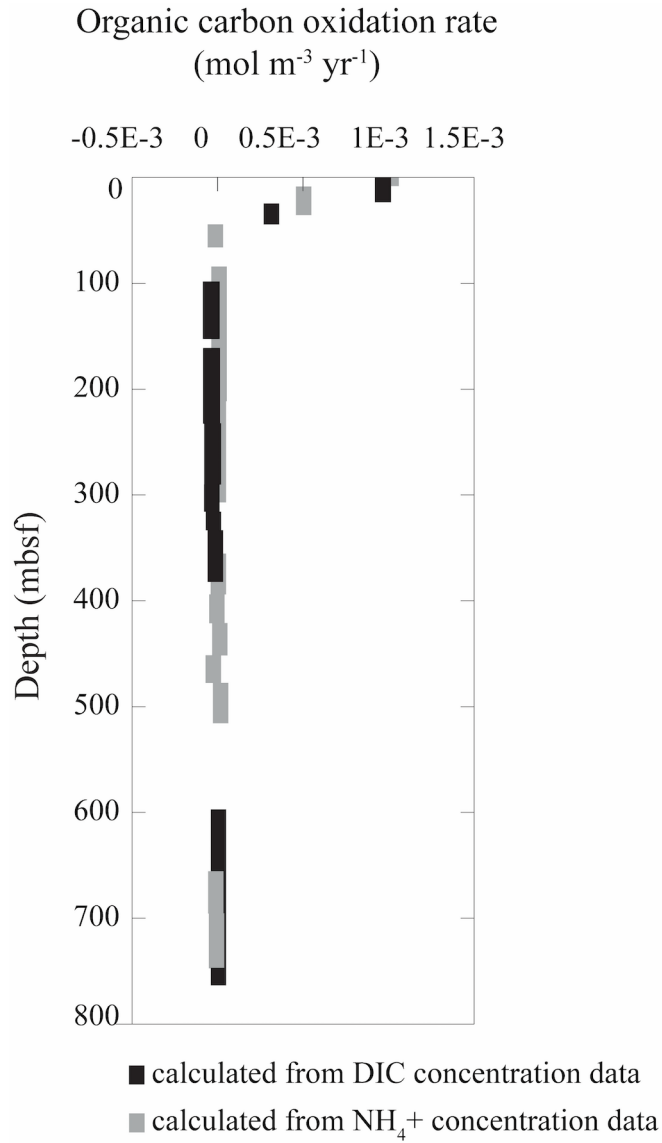

**Figure S6.** Vertical profiles of organic carbon oxidation calculated from DIC concentration data and from NH<sub>4</sub><sup>+</sup> concentration data.
